# Supplementary material for: Facile synthesis and enhanced microwave absorption properties of novel hierarchical heterostructures based on a Ni microsphere–CuO nano-rice core–shell composite
Source: Royal Society of Chemistry journal article supplement (doi:10.1039/c4cp05229c), 2015-01-01
Supplement: c4cp05229c1.pdf [file c4cp05229c1.pdf]

# **Facile synthesis and enhanced microwave absorption property of novel hierarchical heterostructures based on Ni microsphere/CuO nano-rice core-shell composite**

Biao Zhao <sup>a</sup>, Gang Shao <sup>a, \*</sup>, Bingbing Fan <sup>a</sup>, Wanyu Zhao <sup>a</sup>, Rui Zhang <sup>a, b, \*</sup>

<sup>a</sup> School of Materials Science and Engineering, Zhengzhou University, Zhengzhou, Henan 450001, PR China

<sup>b</sup> Laboratory of Aeronautical Composites, Zhengzhou Institute of Aeronautical Industry Management, Zhengzhou 450046, China

\* Corresponding Author.

Dr. Gang Shao

E-mail address: gang\_shao@zzu.edu.cn

Prof. Rui Zhang

Tel: +86-371-60632007

Fax: +86-371-60632600

E-mail address: zhangray@zzia.edu.cn

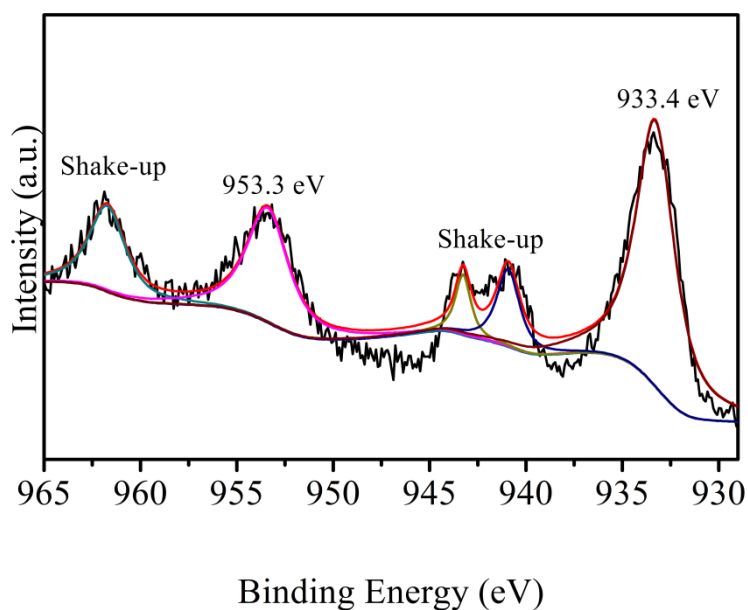

**Fig.S1** Typical XPS spectrum of Cu 2p of the Ni/CuO sample

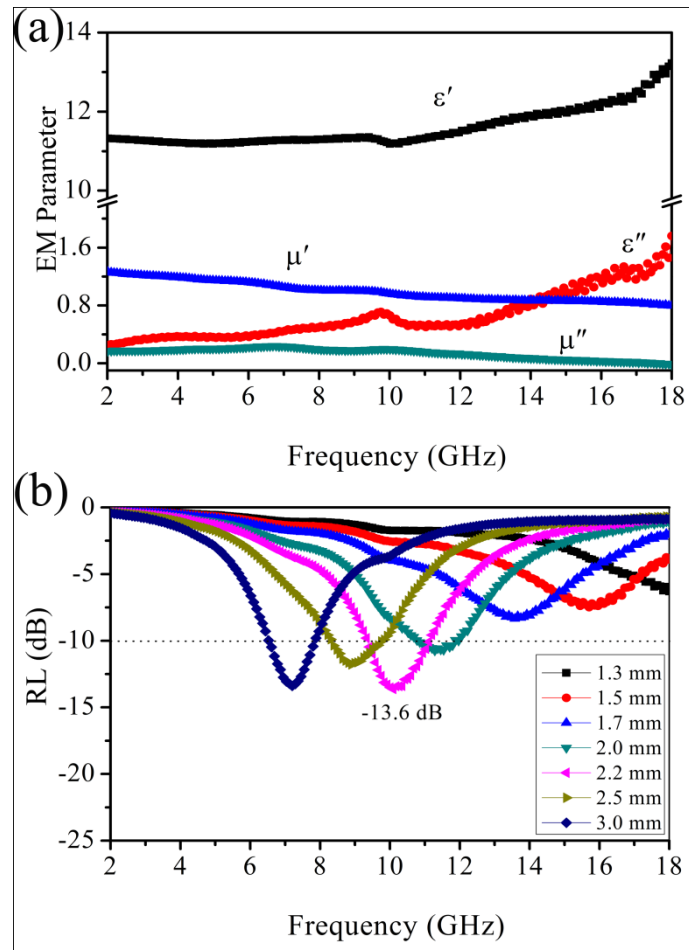

**Fig.S2** (a) The complex permittivity and permeability, (b) simulated reflection loss with various thicknesses of mixture of Ni microspheres and CuO nanoflakes.
